# Supplementary material
Source: PubMed Central journal article supplement (PMC8785735)

Supplemental Figure 1: FSGS Kaplan-Meier curves for renal survival in the whole cohort

Supplemental Figure 2: FSGS Kaplan-Meier curves for renal survival: A) Black patients vs. White patients and B) Hispanic patients vs. Non-Hispanic patients C) Patients with BMI >30 vs. BMI <30

Supplemental Figure 3: FSGS Kaplan-Meier curves for renal survival: A) IgM positive immunofluorescence versus IgM negative immunofluorescence; B) C3 positive immunofluorescence versus C3 negative immunofluorescence; C) IgM and C3 positive immunofluorescence versus IgM and C3 negative immunofluorescence.

Supplemental Figure 4: FSGS Kaplan-Meier curves for renal survival: A) Immunosuppression treatment (IST) versus no IST stratified by estimate glomerular filtration rate  $\geq 60$  ml/min; B) Immunosuppression treatment (IST) versus no IST stratified by estimate glomerular filtration rate < 60 ml/min

Supplemental Figure 5: FSGS Kaplan-Meier curves for renal survival for Immunosuppression treatment (IST) versus no IST stratified by interstitial inflammation  $\geq 15\%$

Supplemental Figure 6: FSGS Kaplan-Meier curve for renal survival for immunosuppression treatment (IST) versus no IST stratified by Black race

# Kaplan-Meier survival estimate

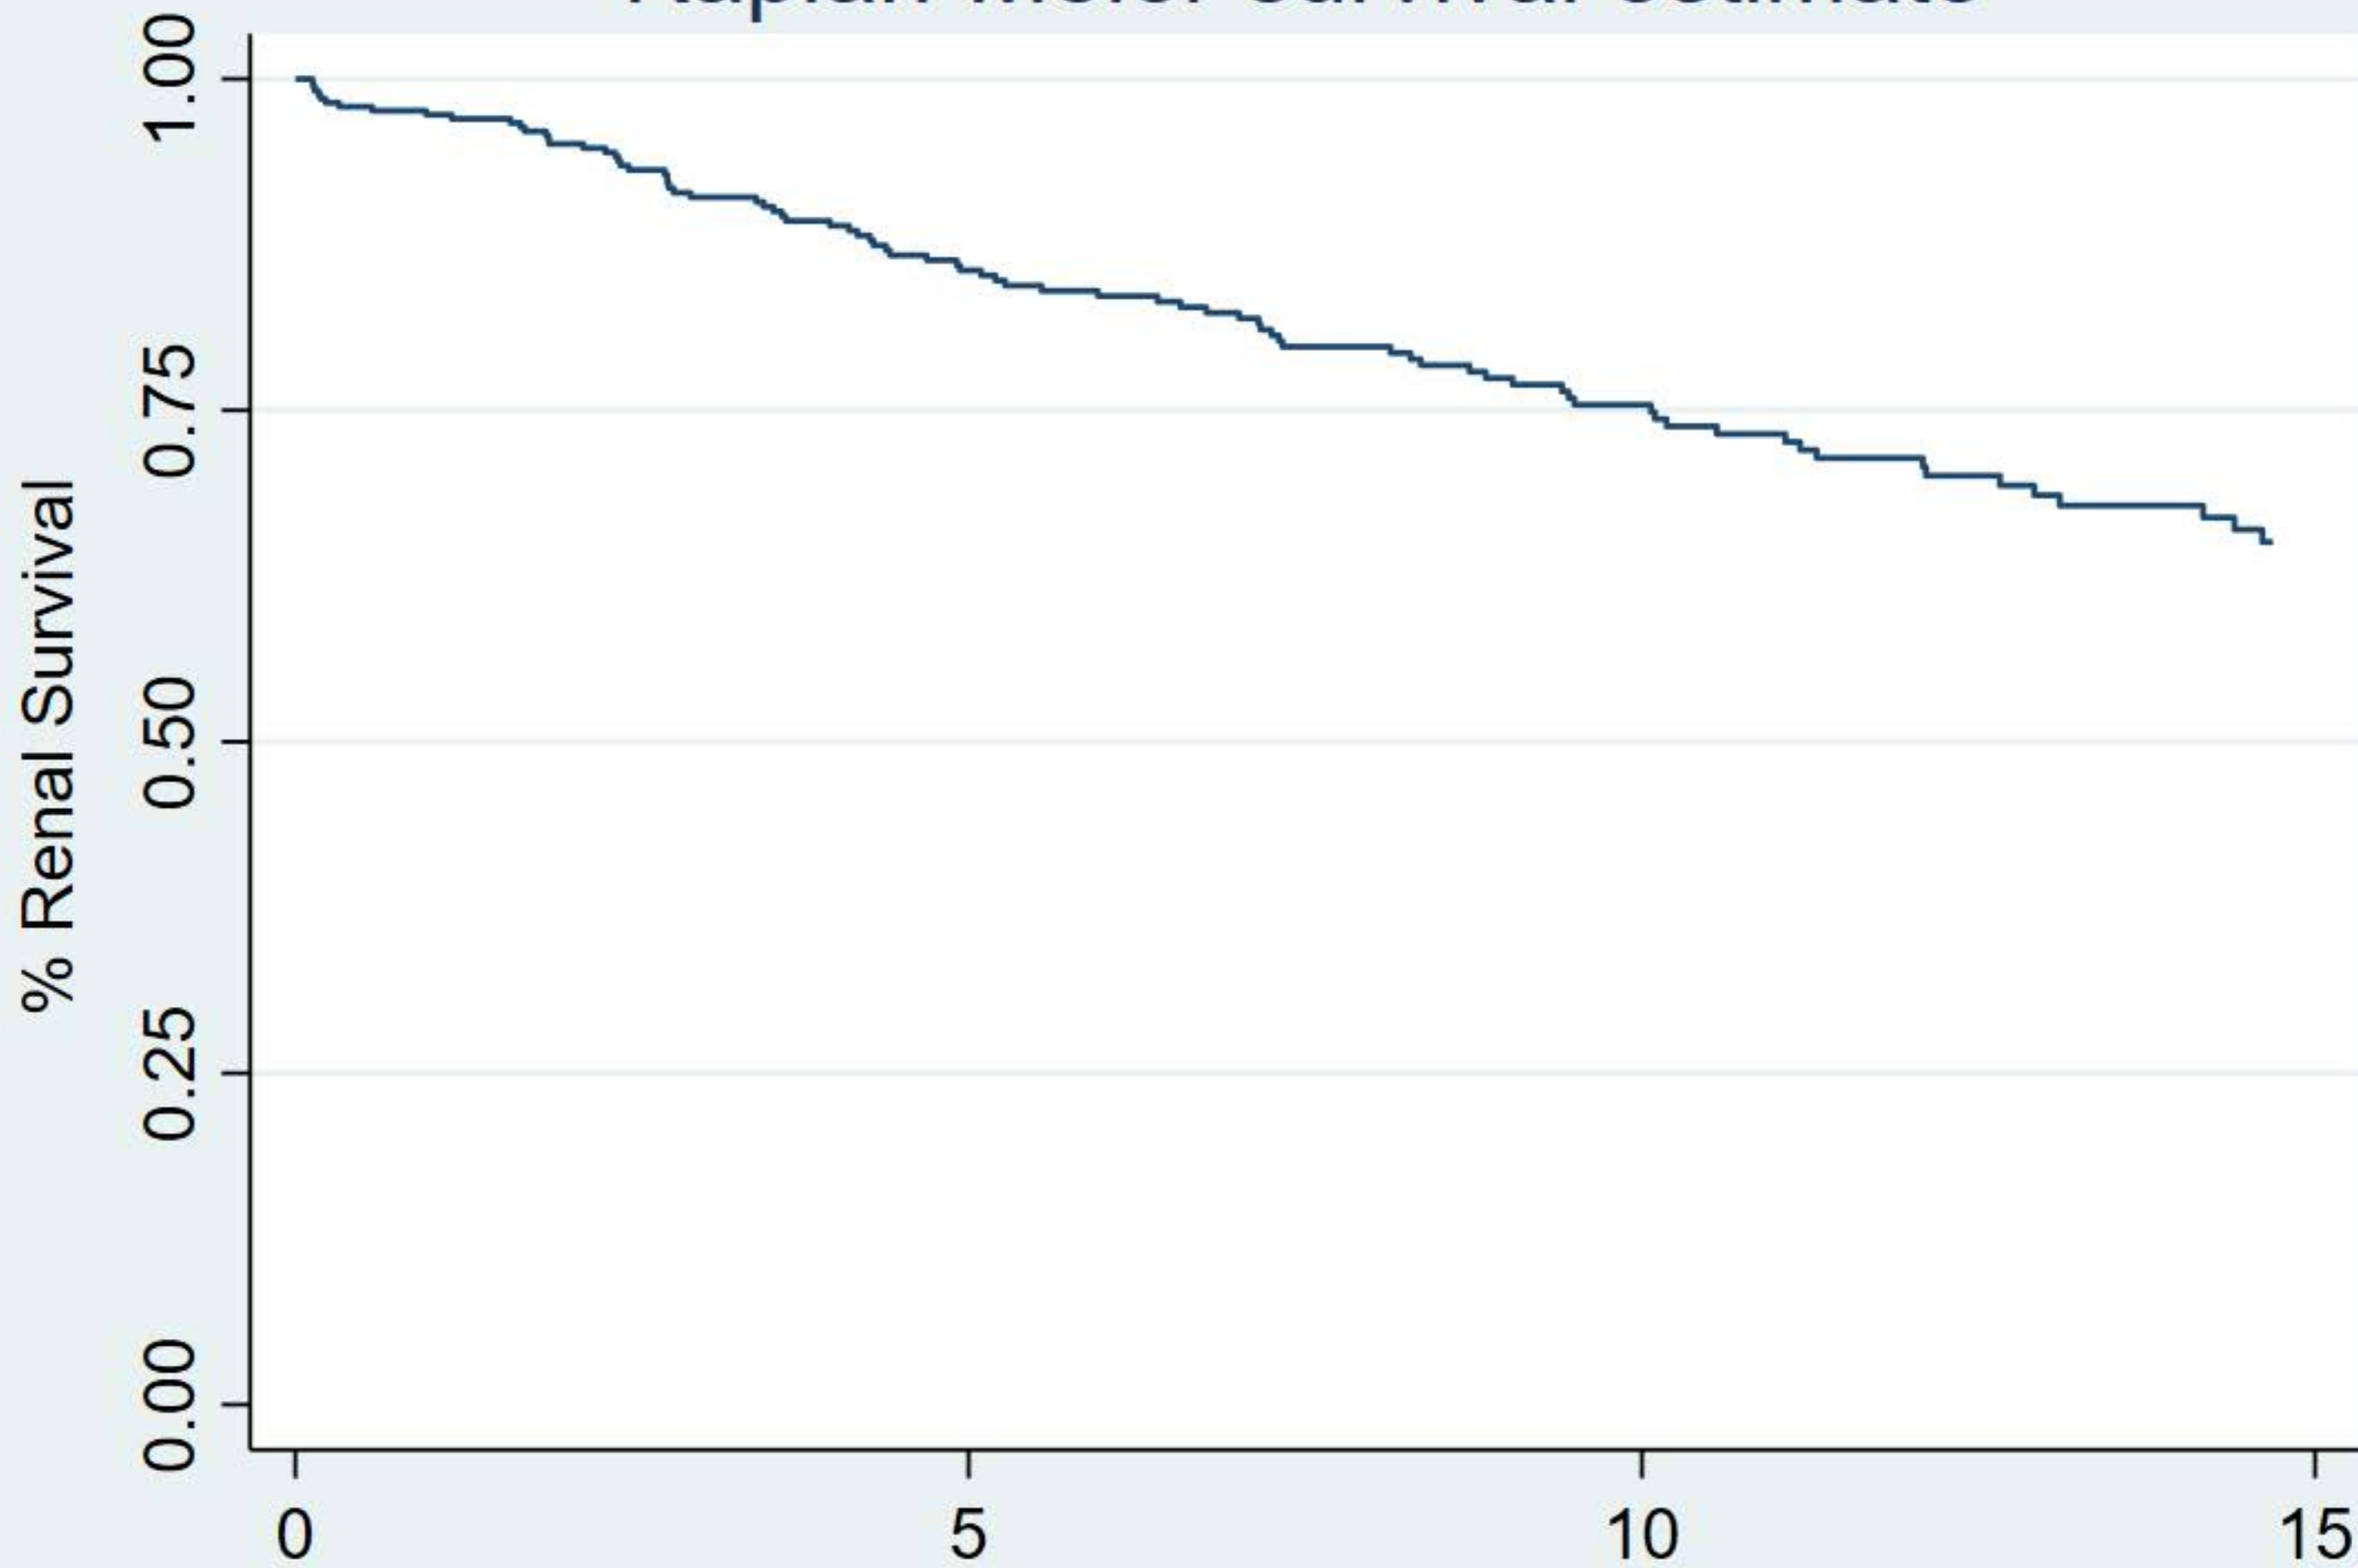

Number at risk

336

225

141

65

### Kaplan-Meier survival estimates

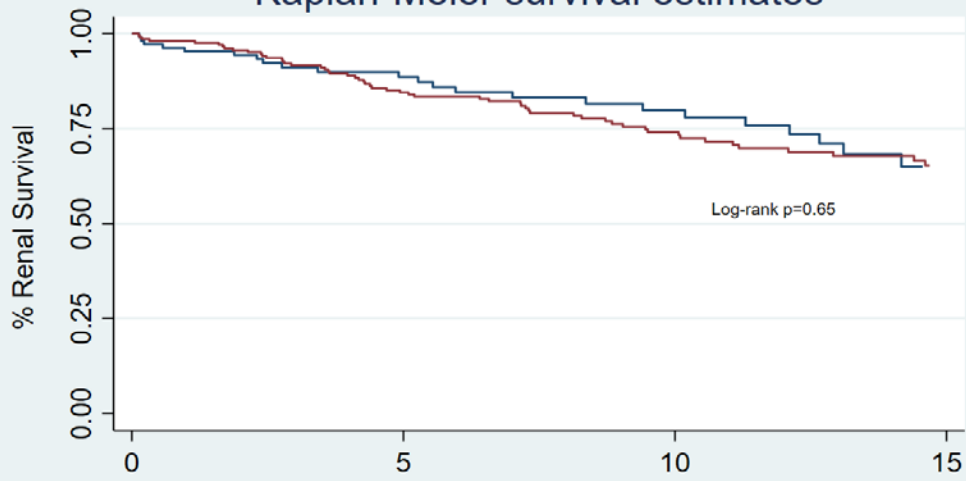

| Number at risk |     | Time after Diagnosis (Years) |    |    |  |
|----------------|-----|------------------------------|----|----|--|
|                | 0   | 5                            | 10 | 15 |  |
| White          | 109 | 68                           | 44 | 18 |  |
| Black          | 214 | 151                          | 94 | 46 |  |

### Kaplan-Meier survival estimates

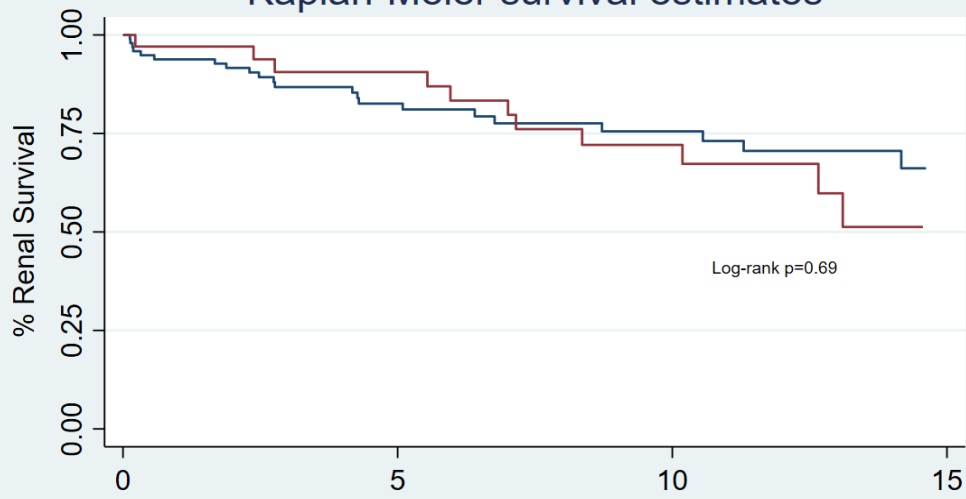

| Number at risk |    | Time after Diagnosis (Years) |    |    |  |
|----------------|----|------------------------------|----|----|--|
|                | 0  | 5                            | 10 | 15 |  |
| Non-Hispanic   | 97 | 57                           | 33 | 14 |  |
| Hispanic       | 34 | 25                           | 15 | 4  |  |

### Kaplan-Meier survival estimates

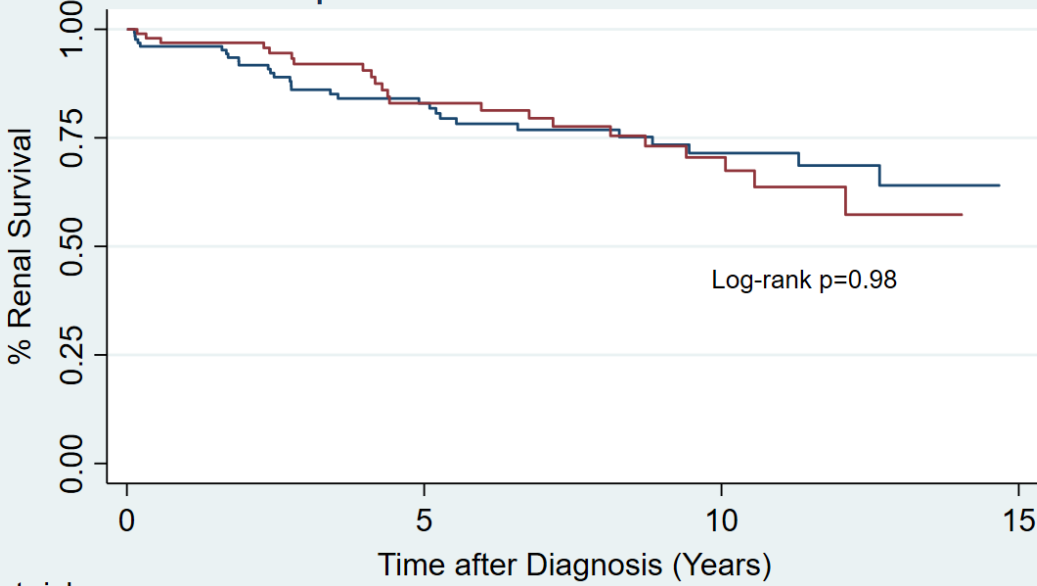

Number at risk

|         |     |    |    |   |
|---------|-----|----|----|---|
| BMI<=30 | 128 | 74 | 34 | 3 |
| BMI>30  | 98  | 53 | 23 | 0 |

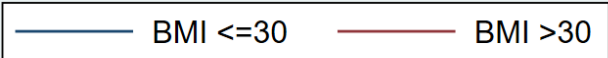

### Kaplan-Meier survival estimates

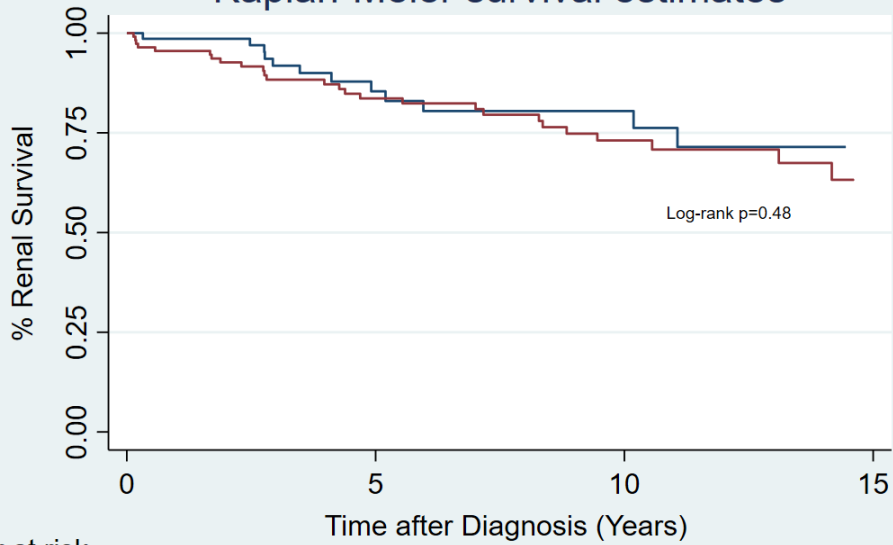

| Number at risk       |     |  |    |    |    |
|----------------------|-----|--|----|----|----|
| Negative C3 staining | 72  |  | 35 | 20 | 7  |
| Positive C3 staining | 113 |  | 70 | 39 | 12 |

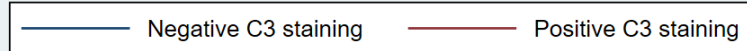

### Kaplan-Meier survival estimates

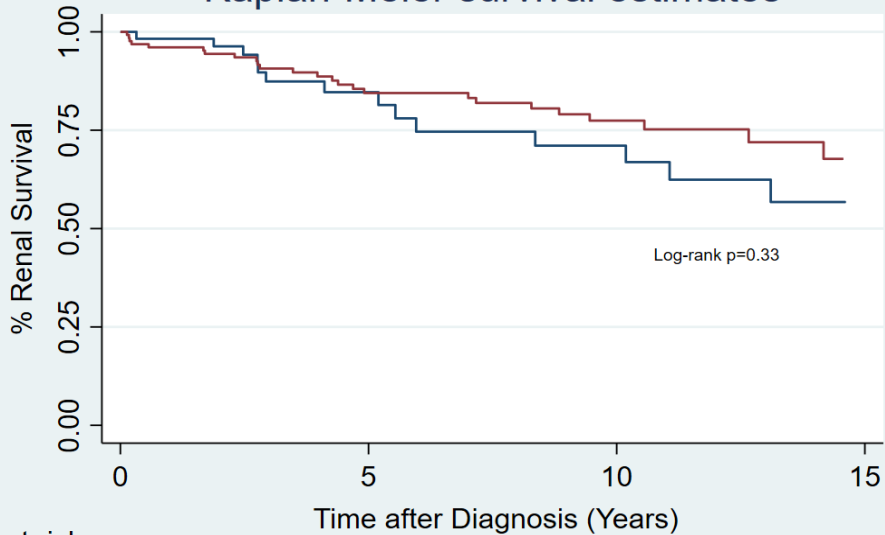

| Number at risk        |     |  |    |    |    |
|-----------------------|-----|--|----|----|----|
| Negative IgM staining | 58  |  | 27 | 17 | 5  |
| Positive IgM staining | 128 |  | 79 | 43 | 14 |

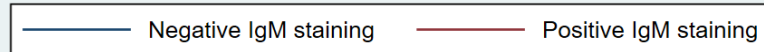

### Kaplan-Meier survival estimates

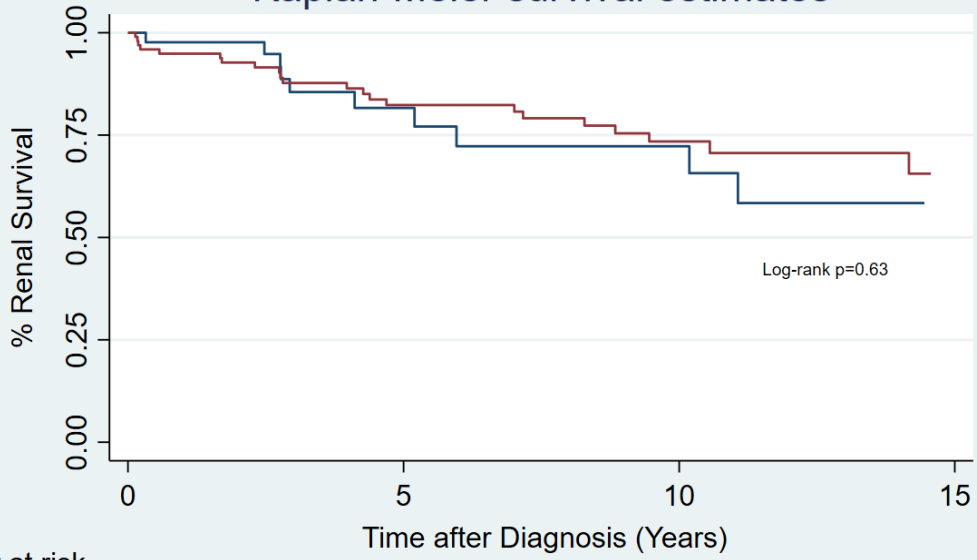

Number at risk

|          |    |    |    |    |
|----------|----|----|----|----|
| c3-/IgM- | 44 | 18 | 11 | 4  |
| c3+/IgM+ | 99 | 61 | 33 | 11 |

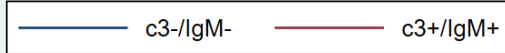

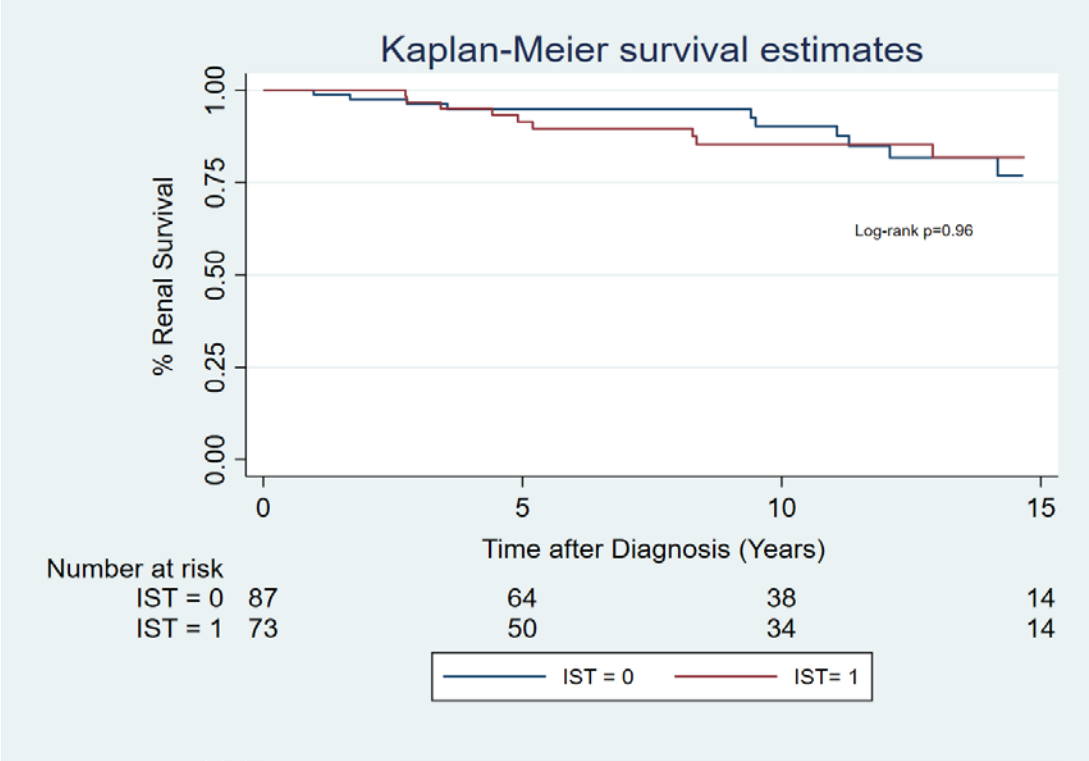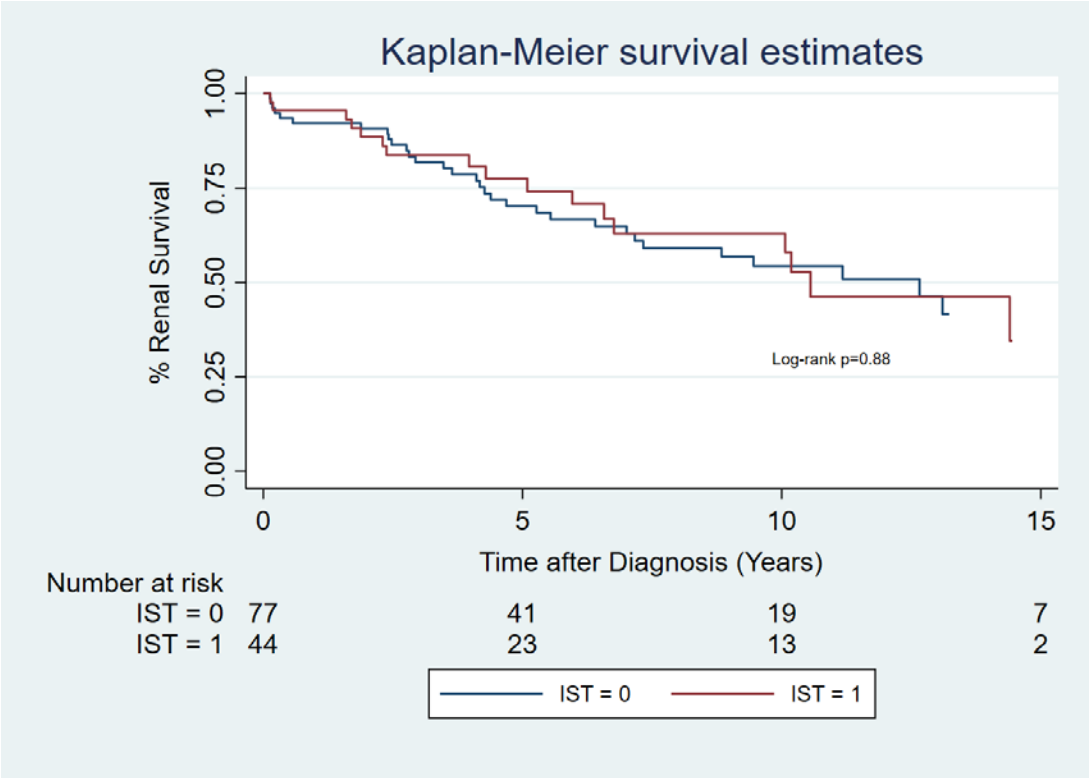

# Kaplan-Meier survival estimates

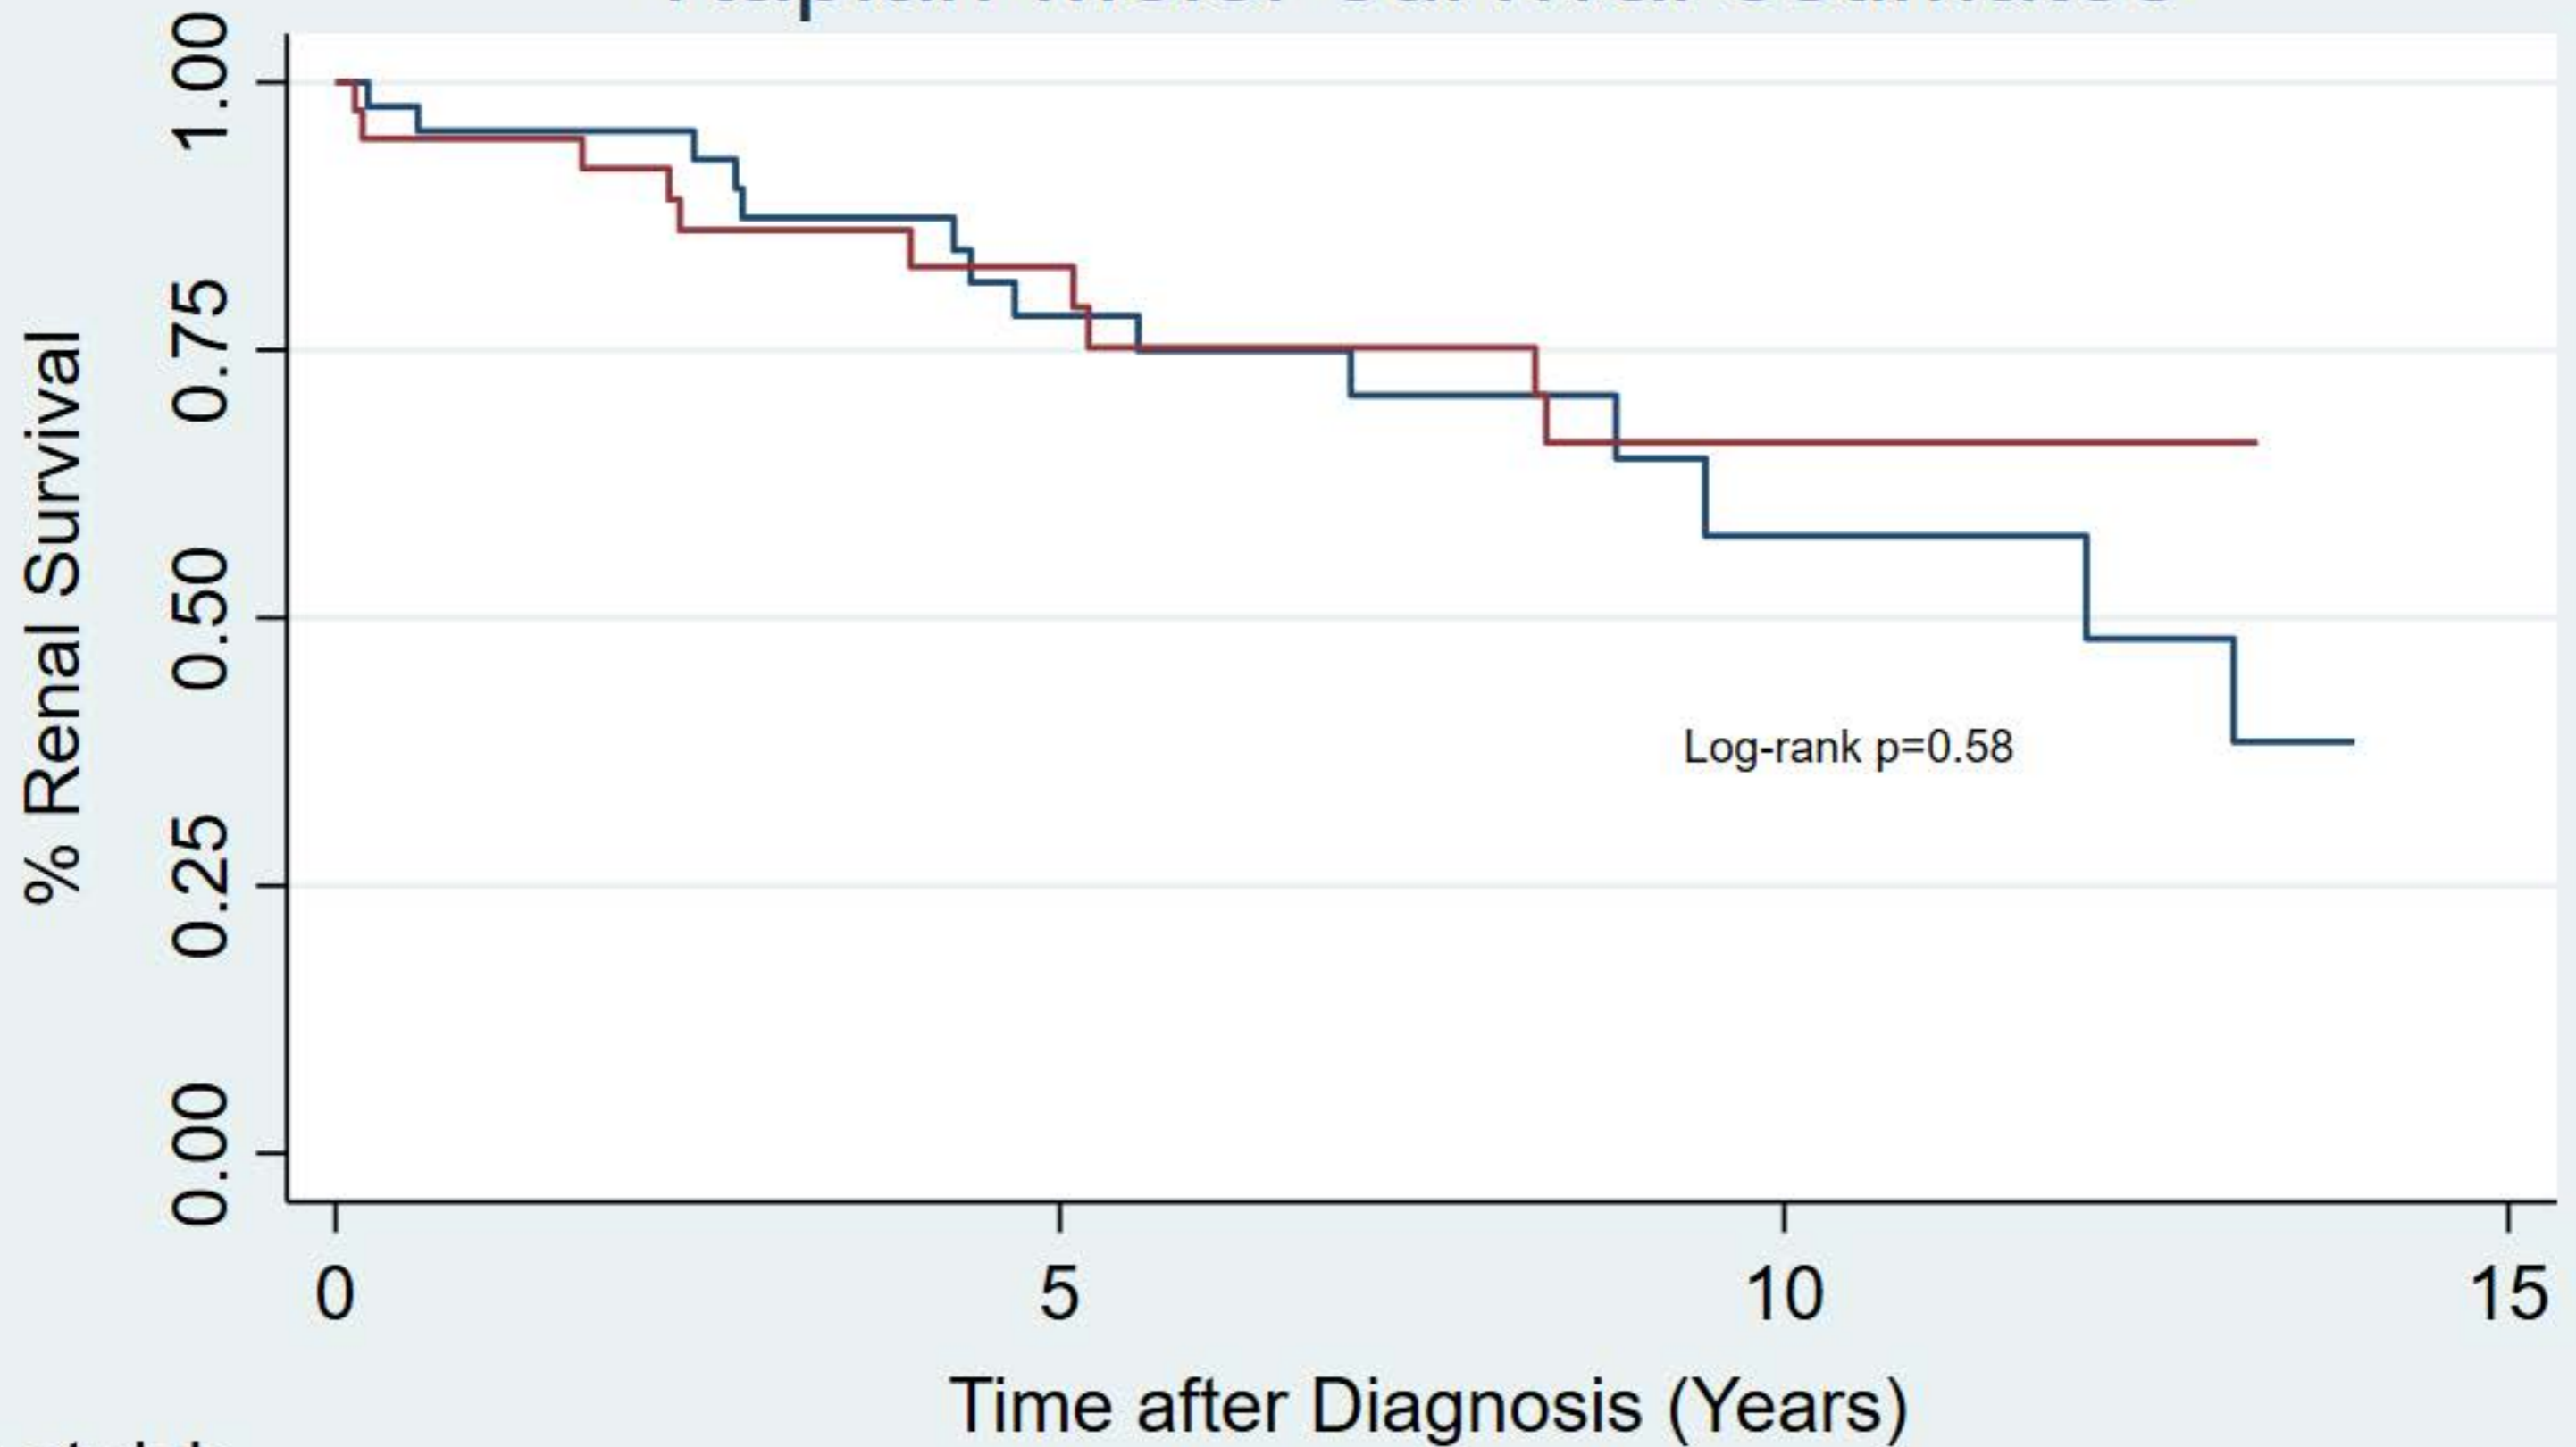

Number at risk

|         |    |    |    |   |
|---------|----|----|----|---|
| IST = 0 | 45 | 25 | 8  | 2 |
| IST = 1 | 38 | 22 | 11 | 1 |

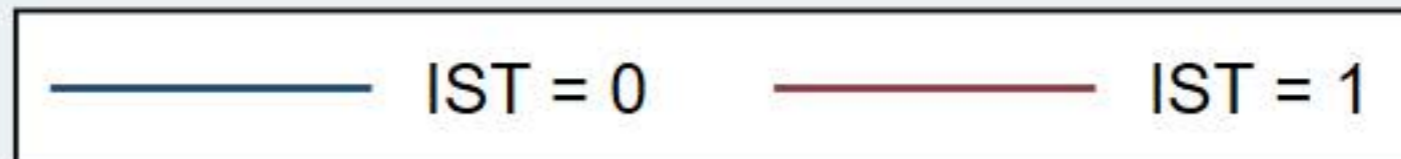



# Kaplan-Meier survival estimates

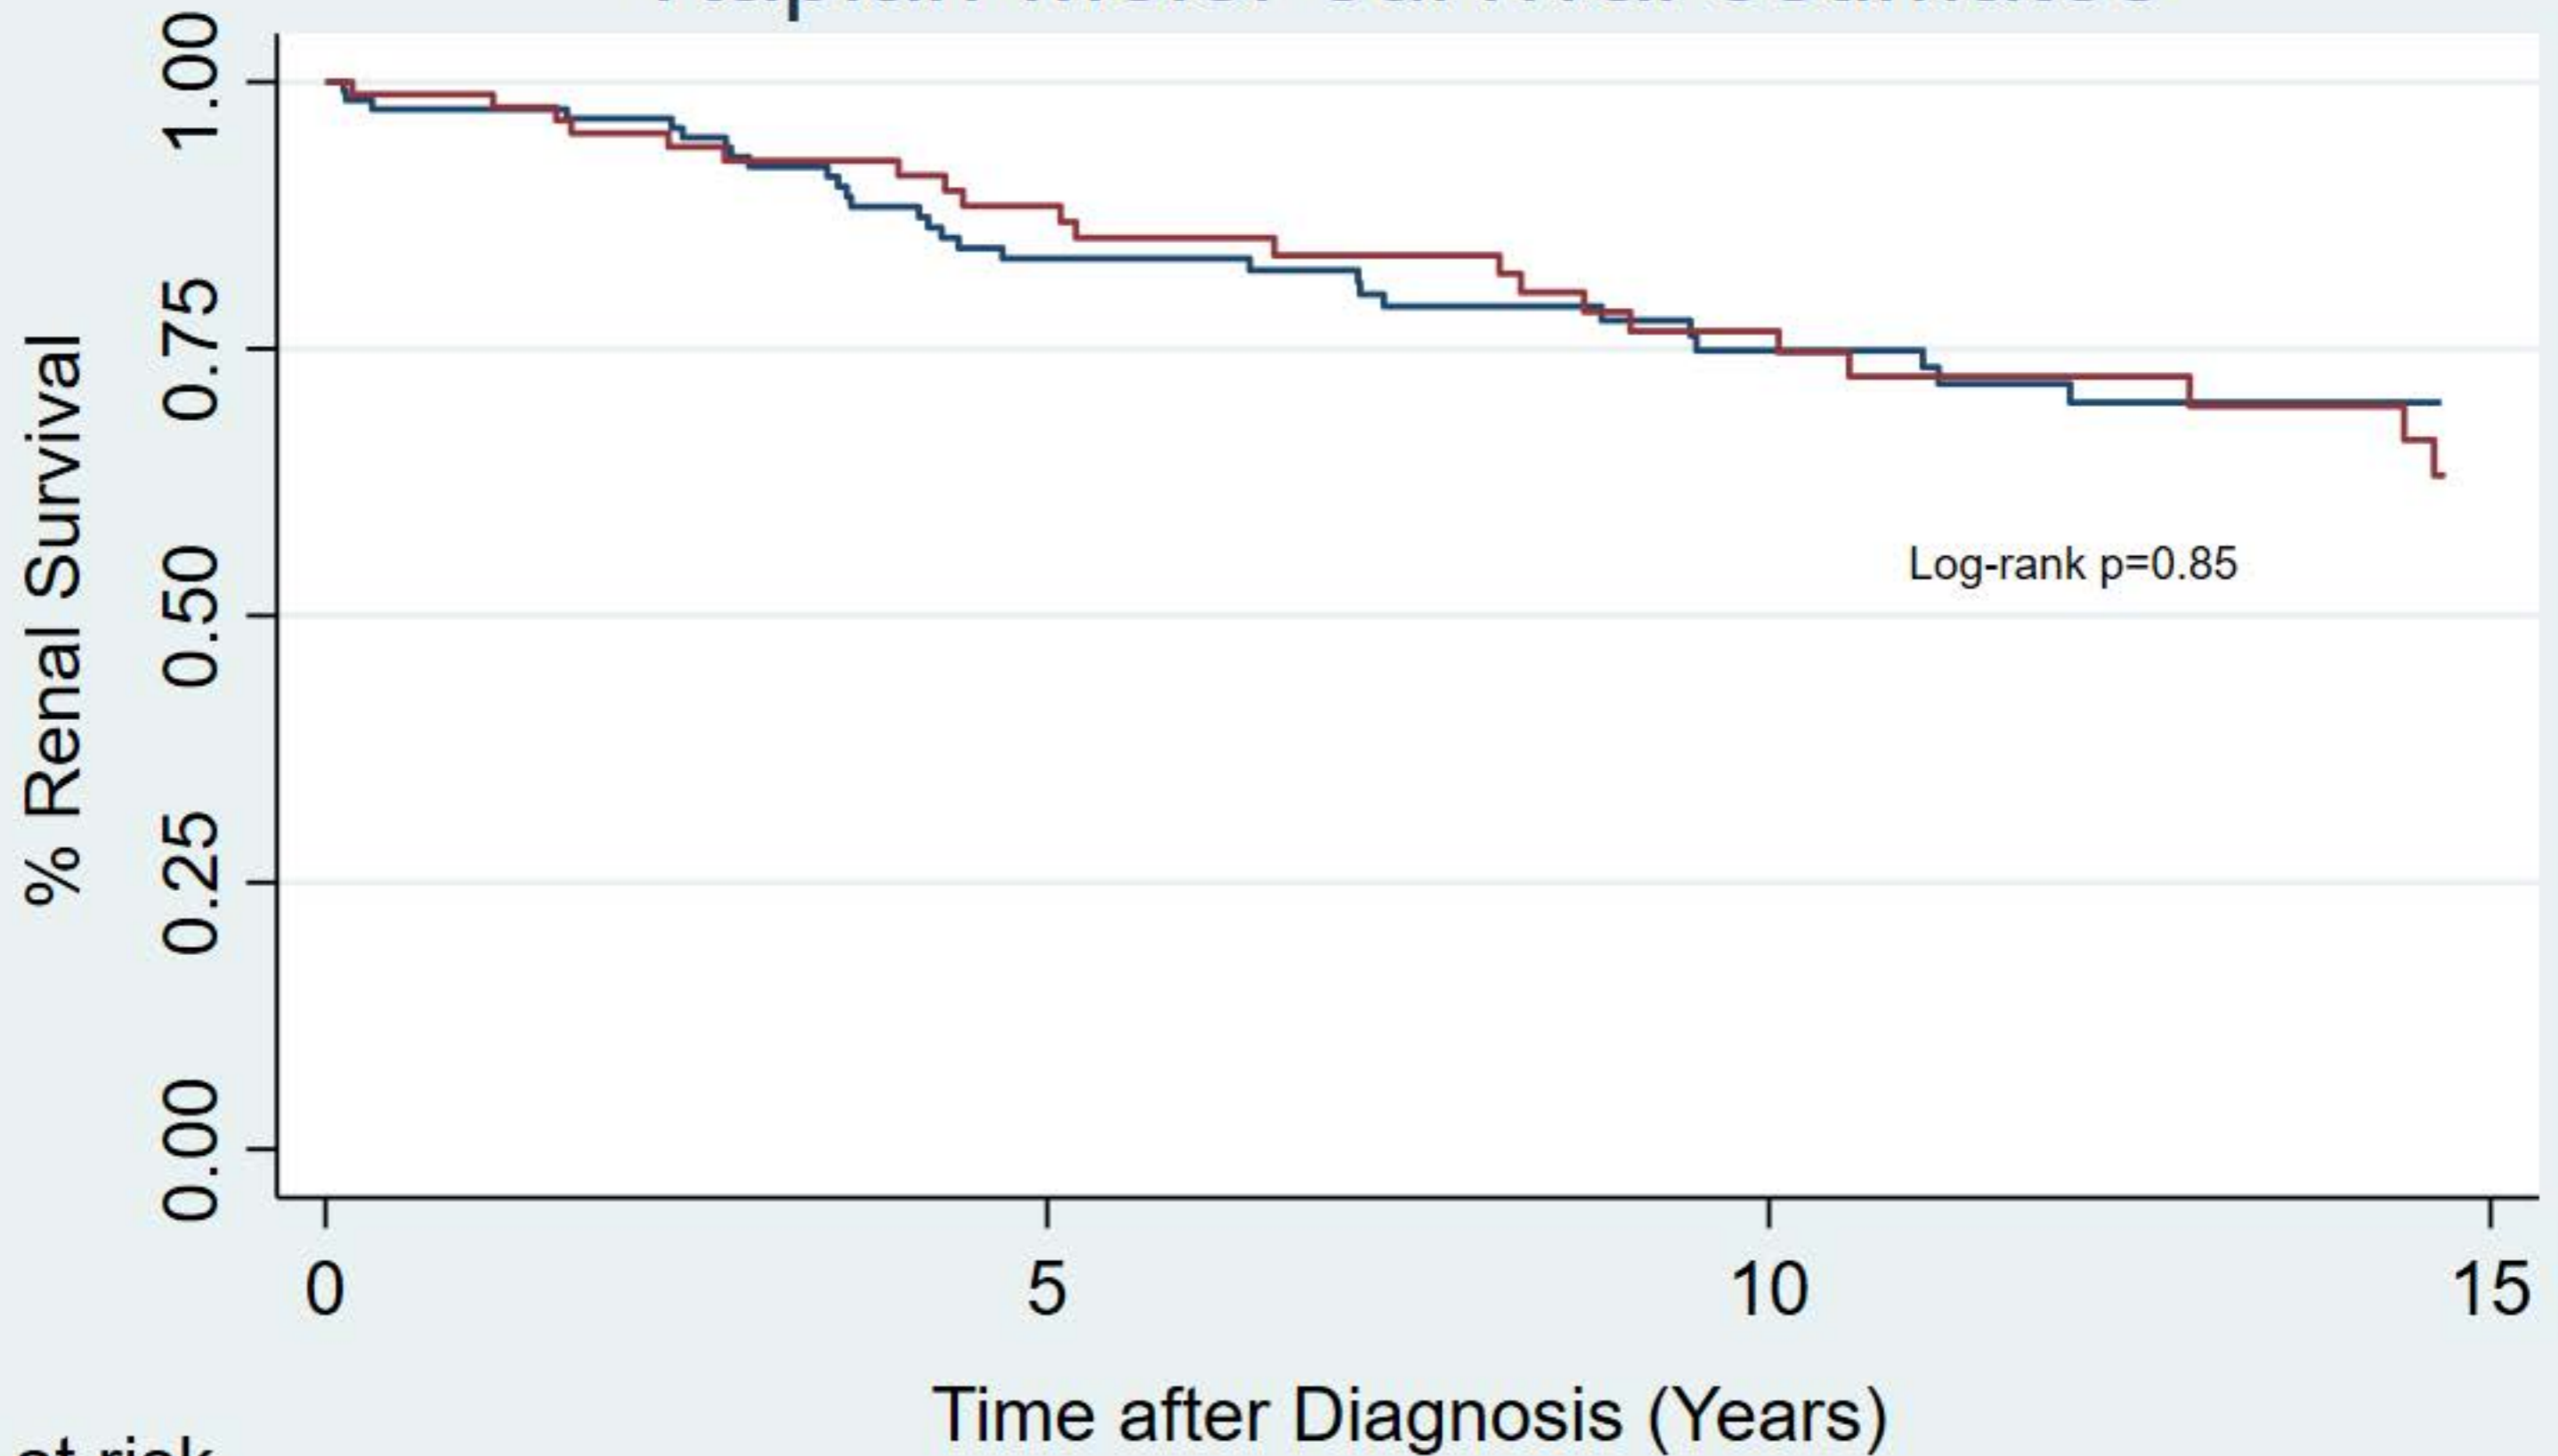

Number at risk

|         |     |    |    |    |
|---------|-----|----|----|----|
| IST = 0 | 119 | 86 | 51 | 27 |
| IST = 1 | 86  | 59 | 39 | 17 |

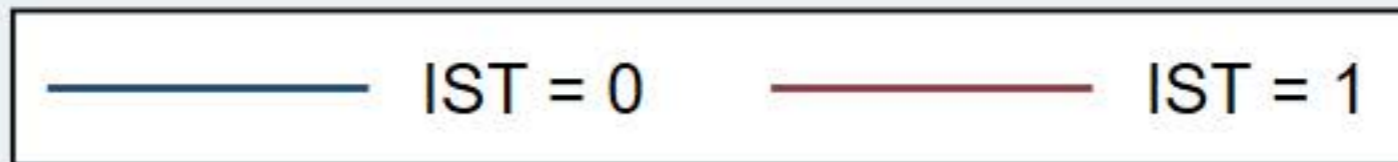

Supplement: KID.0006172020SupplementaryData.pdf [file KID.0006172020SupplementaryData.pdf]
